1 The human oral microbiome is shaped by shared  
2 environment rather than genetics: evidence from a large  
3 family of closely-related individuals

4 Liam Shaw<sup>1,2,\*</sup>, Andre L. R. Ribeiro<sup>3,4,\*</sup>, Adam P. Levine<sup>5</sup>, Nikolas Pontikos<sup>1,6,7</sup>,  
5 Francois Balloux<sup>1</sup>, Anthony W. Segal<sup>5</sup>, Adam P. Roberts<sup>3,8</sup>, Andrew M. Smith<sup>3</sup>

6 1: UCL Genetics Institute, UCL, London, UK

7 2: Centre for Mathematics and Physics in the Life Sciences and Experimental Biology  
8 (CoMPLEX), UCL, London, UK

9 3: UCL Eastman Dental Institute, UCL, London, UK

10 4: School of Dentistry, University Center of Pará – CESUPA, Belém, Brazil

11 5: Division of Medicine, UCL, London, UK

12 6: Institute of Ophthalmology, UCL, London, UK

13 7: Moorfields Eye Hospital, London, UK

14 8: Liverpool School of Tropical Medicine, Liverpool, UK

15 \*: equal contribution

16 Corresponding author: [adam.roberts@lstmed.ac.uk](mailto:adam.roberts@lstmed.ac.uk)

## 17 **Abstract**

18 Word count: 223

19 The human microbiome is affected by multiple factors, including the environment and  
20 host genetics. In this study, we analyzed the oral microbiome of an extended family of  
21 Ashkenazi Jewish individuals living in several cities and investigated associations  
22 with both shared household and host genetic similarities. We found that  
23 environmental effects dominated over genetic ones. While there was weak evidence  
24 of geographic structuring at the level of cities, we observed a large and significant  
25 effect of shared household on microbiome composition, supporting the role of  
26 immediate shared environment in dictating the presence or absence of taxa. This  
27 effect was also seen when including adults who had grown up in the same household  
28 but moved out prior to the time of sampling, suggesting that the establishment of the  
29 oral microbiome earlier in life may affect its long-term composition. We found weak  
30 associations between host genetic relatedness and microbiome dissimilarity when  
31 using family pedigrees as proxies for genetic similarity. However this association  
32 disappeared when using more accurate measures of kinship based on genome-wide  
33 genetic markers, indicating that environment rather than host genetics is the dominant  
34 factor affecting the composition of the oral microbiome in closely-related individuals.  
35 Our results support the concept that there is a consistent core microbiome conserved  
36 across global scales, but that small-scale effects due to shared living environment  
37 significantly affect microbial community composition.

38

39 Word count: 145

40 **IMPORTANCE.** Previous research shows that relatives have a more similar oral  
41 microbiome composition than non-relatives, but it remains difficult to distinguish the  
42 effects of relatedness and shared household environment. Furthermore, pedigree  
43 measures may not accurately measure host genetic similarity. In this study, we  
44 include genetic relatedness based on genome-wide SNPs (rather than pedigree  
45 measures) and shared environment in the same analysis. We quantify the relative  
46 importance of these factors by studying the oral microbiome in members of a large  
47 extended Ashkenazi Jewish family who share a similar diet and lifestyle despite living  
48 in different locations. We find that host genetics plays no significant role and that the  
49 dominant factor is shared environment at the household level. We also find that this

50 effect appears to persist in individuals who have moved out of the parental household,  
51 suggesting that the oral microbiome established earlier in life persists long-term.

## 52 **Introduction**

53 The human microbiome is the name given to the collected communities of bacteria  
54 that live on and in the human body. The oral microbiome is one of the most diverse  
55 (1) of any human-associated microbial community (2). The oral microbiome is a  
56 causative factor in conditions such as dental caries (3), periodontal disease (4), and  
57 halitosis (5), and has also been implicated as a reservoir for infection at other body  
58 sites (2) and in the pathogenesis of non-oral diseases, such as inflammatory bowel  
59 disease (6). Strictly speaking there is no single ‘oral microbiome’ as its composition is  
60 highly heterogeneous across different sites in the mouth (7, 8), but the term is  
61 commonly used to encompass all of these. Site-specific microbiomes can be observed  
62 in the periodontal sulcus, dental plaque, tongue, buccal mucosa and saliva (9). The  
63 salivary microbiome exhibits long-term stability and can be considered as an  
64 important reservoir that contains microorganisms from all distinct ecological niches  
65 of the oral cavity. Characterizing and understanding the factors defining salivary  
66 microbial composition is thus crucial to understanding the oral microbiome (10, 11).

67

68 Some factors that are thought to influence the human microbiome include  
69 environment, diet, disease status and host genetics (12). The relative importance of  
70 these factors for the oral microbiome is still under debate, with the majority of  
71 previous studies focusing on the gut microbiome (7-9), although it seems reasonable  
72 to assume some potential interaction between the oral microbiome and microbial  
73 communities in other parts of the human body including the intestinal tract (10).

74

75 There is evidence that genetically related individuals tend to share more gut microbes  
76 than unrelated individuals, whether or not they are living in the same house at the  
77 time of sampling (13, 14). However, the level of covariation is similar in monozygotic  
78 and dizygotic twins, suggesting that a shared early environment may be a more  
79 important factor than genetics (13, 15). The effect of co-habitation with direct and  
80 frequent contact is greatest when considering the skin microbiome, with a less-evident  
81 effect on the gut and oral microbiomes (11).

82

83 There is also evidence that genetic variation is linked to microbiome composition  
84 across other body sites, including the mouth (12), with a recent genome-wide

85 association study (GWAS) identifying several human loci associated ( $p < 5 \times 10^{-8}$ )  
86 with microbial taxonomies in the gut microbiome (16). However, no study to date has  
87 incorporated both genetic relatedness as a continuous variable and shared  
88 environment into the same analysis of the oral microbiome.

89

90 Despite high diversity between individuals, the oral microbiome appears to have little  
91 geographic structure at genus level at the global scale (17). Nevertheless, at smaller  
92 geographical scales it appears that the environment plays a role. Song et al. studied 60  
93 household units and found that the bacterial composition of dorsal tongue samples  
94 was more similar between cohabiting family members than for individuals from  
95 different households, with partners and mother-child pairs having significantly more  
96 similar communities (18). However, this did not include information on genetic  
97 relatedness in addition to family relationships. It appears that household-level  
98 differences in the oral microbiome may also apply to genetically unrelated individuals  
99 and non-partners, with a similar pattern observed in analysis of saliva samples from  
100 24 household pairs of genetically unrelated individuals, only half of whom were  
101 considered romantic couples at the time of sampling (19).

102

103 The establishment of the oral microbiome appears to proceed rapidly in the first few  
104 years of life, with a notable increase in diversity from 0-3 years (18), especially after  
105 the eruption of teeth (20). The oral microbiome also appears stable within individuals  
106 over at least a period of 3 months, with a unique ‘fingerprint’ of oligotypes  
107 discernible even within a single bacterial genus (21). These two facts suggest that the  
108 establishment of a particular oral microbiome composition early in life could  
109 potentially persist into adulthood, particularly if external factors such as diet remain  
110 fixed.

111

112 A recently described large Ashkenazi Jewish family (22) offers an opportunity to  
113 investigate the effect of both environment and genetics in closely-related individuals.  
114 The availability of host genetic data for this cohort means that we can calculate  
115 similarity between individuals based on SNPs, rather than using measures of  
116 relatedness from pedigrees that do not precisely correspond to shared genetic content  
117 (23). We hypothesized that using this more accurate measure of host genetic  
118 similarity could lead to different conclusions about the proportion of shared

119 microbiome composition attributable to genetics compared with previous studies.  
120 Furthermore, due to shared cultural practices we can be reasonably confident that  
121 environmental factors such as diet and lifestyle are largely controlled for, compared to  
122 other studies where they may be significant confounders (17). For this reason, this  
123 cohort represents a unique opportunity to compare the oral microbiome within a large  
124 number of individuals living in separate locations but nevertheless sharing a similar  
125 diet, lifestyle, and genetic background, and to investigate the long-term effect of  
126 shared upbringing on oral microbiome composition.

## 127 **Results**

### 128 **Description of cohort**

129 We found 271 phylotypes in the total dataset, all of which were present when  
130 considering just Family A. 49 of these phylotypes were present in >95% of  
131 individuals within Family A, with the *Firmicutes* the most abundant phyla (Figure 1a)  
132 as observed in previous oral microbiome studies (15, 24). The most abundant genera  
133 were *Streptococcus* (30.4%), *Rothia* (18.5%), *Neisseria* (17.1%), and *Prevotella*  
134 (17.1%). Composition of samples was similar between the two families (A and B) and  
135 the unrelated controls (Figure 1b). These groupings had a small but significant effect  
136 in an analysis of variance ( $R^2=0.015$ ,  $p<0.01$ ) but this is typical of comparisons  
137 between such large groups that may differ in an unknown number of confounded  
138 variables (e.g. diet, genetics, lifestyle). We concluded that Family A was at the very  
139 least a representative sample capturing the majority of the variation present in the  
140 wider Ashkenazi Jewish population, if not also non-Ashkenazi-Jewish individuals (for  
141 comparison with Human Microbiome Project data see Supplementary Figure 4).

142  
143 This cohort was originally collected for a study of the genetics of Crohn's disease  
144 (22), and 28 individuals within our sample had a diagnosis of the disease at the time  
145 of saliva sample acquisition. We found no significant effect of Crohn's disease on  
146 oral microbiome composition with an exploratory analysis of variance ( $R^2=0.009$ ,  
147  $p=0.101$ ,  $n=148$ ) accounting for other variables. It was therefore not included as a  
148 covariate in further analysis.

149

150 **Host genetic similarity is weakly correlated with oral microbiome similarity**

151 We performed an exploratory analysis on individuals in Family A with both genetic  
152 and microbiome data available ( $n=111$ , Supplementary Figure 5), and found that  
153 genetic kinship was weakly but significantly associated with oral microbiome  
154 dissimilarity computed using Bray-Curtis distances (Supplementary Figure 6; Mantel  
155 test  $r=0.065$ ,  $p=0.001$ ). This analysis does not take into account confounding by  
156 shared environment, and therefore sets a probable upper bound on the variation that  
157 can be attributed to host genetics. Household appeared to be related to oral  
158 microbiome composition (Figure 2), but is obviously correlated with variation in host  
159 genetics (Supplementary Figure 7) because parents tend to live with their children.  
160 This emphasizes the need for a quantitative approach looking at the effect of both  
161 household and genetics simultaneously.

162

### 163 **Shared household is the dominant factor affecting oral microbiome composition**

164 We next performed a permutational analysis of variance on the oral microbiome  
165 dissimilarities for 28 individuals within Family A, each of whom lived in a household  
166 with at least one other individual in the cohort. At the time of sampling, these co-  
167 habiting individuals lived across a total of 16 households in four cities (I, II, III, IV).  
168 To account for host genetics, we included axes from a metric multidimensional  
169 scaling (MDS) of pairwise genetic distances between individuals as explanatory  
170 variables (see Methods and Supplementary Figure 8).

171

172 There was no significant effect of any of the MDS axes, suggesting that host genetics  
173 in closely-related individuals does not significantly affect microbiome composition.  
174 We investigated the effect of environment using two levels of geography: city and  
175 household (Table 1a). A city-only model showed no significant effect of environment  
176 ( $R^2=0.08$ ,  $p=0.4$ ), whereas a household-only model showed a significant effect  
177 ( $R^2=0.30$ ,  $p=0.001$ ). This was reproduced in a model containing both geographic  
178 variables, with permutations stratified by city, where household was still a significant  
179 effect ( $R^2=0.22$ ,  $p=0.001$ ), suggesting that differences at the level of household are  
180 more important than at larger geographical scales. We confirmed that city-level  
181 effects were small by extending our sample to 82 individuals across the four cities  
182 who were not necessarily cohabiting with others (I: 48, II: 13, III: 12, IV: 9), and  
183 found that city still had a small effect, although it was significant ( $R^2=0.053$ ,  $p<0.01$ ).

184 In this analysis we also found no significant effect of genetics, but age was significant  
185 ( $R^2=0.028$ ,  $p=0.0101$ ) (Supplementary Table 1).

186

### 187 **Spouses share taxa at the species level**

188 Restricting the analysis to only married couples within Family A ( $n=16$ , eight  
189 couples), shared household explained even more of the variance ( $R^2=0.591$ ,  $p=0.001$ ).

190 Subtle variations in the relative abundance of phylotypes within the same genus  
191 between households were observable, even within the same city location. For  
192 example, *Leptotrichia* phylotypes varied consistently between spouse pairs and these  
193 patterns were also seen in children living at home (Figure 3). MED phylotype X2772  
194 was present in both spouses in household A1.7, and was also present in the two  
195 youngest children within that household (aged 10 or under). Similarly, within  
196 household A2.4 the two children aged 10 or under were more similar in *Leptotrichia*  
197 phylotypes than an older child. Similar patterns with spouses were also visible in  
198 other abundant genera (Supplementary Figure 9).

199

### 200 **Household effects persist in individuals who are no longer co-habiting**

201 There were an additional 35 individuals who had grown up in a household with at  
202 least one other individual present, but who no longer lived together at time of  
203 sampling. To see if the effects of household persisted, we repeated analysis of  
204 variance with these individuals included along with the cohabiting-individuals ( $n=61$ ,  
205 Table 1b). The effect of household remained significant ( $R^2=0.183$ ,  $p=0.044$ ), and no  
206 axes of human genetic variation were significant ( $p>0.05$ ). Age had a significant  
207 effect ( $R^2=0.038$ ,  $p<0.01$ ).

208

209 Other variables such as age and sequencing plate had smaller effects than household  
210 in all our analyses of variance. However, the order of variables can have an effect  
211 when performing adonis with an unbalanced design. To check this was not biasing  
212 our results, we randomly permuted the order of variables in our model and confirmed  
213 that household was always significant ( $q<0.05$ , Benjamini-Hochberg multiple testing  
214 correction) as was age (see Supplementary Material).

215

### 216 **Relying on pedigree kinships produces a genetic signal**



217 To test whether our conclusions required using kinships estimated from genome-wide  
218 SNP data for individuals, or whether pedigree information was sufficient, we also  
219 repeated our analyses using pedigree kinships (see Methods). Using pedigree kinships  
220 resulted in a small but significant amount of variation in microbiome composition  
221 being attributable to host genetics via MDS axis 4 ( $R^2=0.016$ ,  $p<0.01$ , Table 2).

## 222 **Discussion**

223 We have conducted, to our knowledge, the first simultaneous investigation of the role  
224 of environment and host genetics in shaping the human saliva microbiome in a cohort  
225 of closely-related individuals within a large Ashkenazi Jewish family. We found a  
226 weak correlation between host kinship and oral microbiome dissimilarity before  
227 taking shared household into account, and an apparent small but significant effect of  
228 genetics when using kinships based on the family pedigree as proxies for genetic  
229 similarity. However, when using kinship estimates based on genome-wide SNPs  
230 between individuals and simultaneously controlling for shared household with a  
231 permutational analysis of variance, we find no support for any clear effect of human  
232 genetics, suggesting that shared environment has a much larger effect than genetics  
233 and is the dominant factor affecting the oral microbiome ( $R^2>0.18$ ). We also observe  
234 that shared household explains more variation for spousal pairs than for children, and  
235 that younger children living in the same household share subtle variations in  
236 phylotype abundance within genera with their parents (Figure 3). Taken together,  
237 these observations support the view that human genetics does not play a major role in  
238 shaping the oral microbiome, at least not in individuals of the same ethnicity,  
239 compared to the environment.

240

241 Our results confirm the seemingly paradoxical situation that the oral microbiome is  
242 largely consistent across global geographical scales, but can show large variation  
243 between households in the same city. Previous studies have also found evidence of  
244 small variations in oral microbiome composition comparing samples across a global  
245 scale (17). As noted previously, this variation could be influenced by differences in  
246 environmental or cultural factors, in which case controlling for these differences  
247 would decrease the amount of geographical variation. All individuals in our study  
248 follow a traditional Ashkenazi Jewish lifestyle and subsequently are thought to share

249 a similar diet and lifestyle regardless of geographic location (25), which may reduce  
250 the variation attributable to city-level differences.

251

252 The establishment of the oral microbiome early in life may lead to the persistence of a  
253 similar composition over several years. The oral microbiome has been previously  
254 observed to be remarkably persistent within individuals over periods of months (21)  
255 to a year (26), and we see similar strain-level variation between spouses and their  
256 young children (Figure 3). Our results suggest that the oral microbiome composition  
257 established early in life via shared upbringing is able to persist for at least several  
258 years, because of the persistence of household effects in individuals no longer co-  
259 habiting. It has been observed that monozygotic twins do not have significantly more  
260 similar gut microbiomes than dizygotic twins (13). Stahringer et al. observed the same  
261 effect in the oral microbiome, and also found that twins' oral microbiomes became  
262 less similar as they grew older and ceased cohabiting, concluding that 'nurture trumps  
263 nature' in the oral microbiome (15). Our findings from a large number of related  
264 individuals rather than twins support this view, including the persistence of shared  
265 upbringing effects. Shared upbringing appears to be the dominant factor affecting  
266 microbiome composition in both the gut and the mouth, rather than genetic similarity.  
267 This may have implications for understanding the familial aggregation of diseases  
268 such as inflammatory bowel disease, which has been suggested to have an  
269 environmental component (27).

270

271 The oral microbiome appears far more resilient to perturbation compared to the gut  
272 microbiome, with a rapid return to baseline composition after a short course of  
273 antibiotics (28). While this could be because of the pharmacokinetics of the  
274 antibiotics involved, Zaura et al. speculate that this difference may be due to the oral  
275 microbial ecosystem's higher intrinsic resilience to stress, as the mouth is subject to  
276 more frequent perturbation (29). Our work supporting the dominant role of the  
277 environment in affecting oral microbiome composition suggests that another  
278 important factor in long-term persistence may be the regular reseeded of the  
279 ecosystem with bacteria from the external environment.

280

281 The fact that we reached our conclusion about the lack of effect of genetics only after  
282 including kinship based on genome-wide SNP markers casts doubt on the reliability

283 of pedigrees for calculating relatedness. There are several possible reasons for a  
284 discrepancy between kinship estimates from pedigrees and allele sharing (23). One  
285 possibility is errors in the pedigree, most likely due to extra-pair paternities, although  
286 this explanation can be ruled out in this dataset. More importantly, inherent  
287 stochasticity in the Mendelian process of inheritance means that although parents  
288 always pass on 50% of their genes to their offspring, SNPs are inherited together in  
289 blocks (i.e. haplotypes), meaning that the relatedness between two offspring in a  
290 family can be substantially different from 50%. Finally, and most importantly for this  
291 closely-related population, shallow pedigrees cannot fully capture complex inbreeding  
292 patterns. Thus, while pedigrees are a good model for host relatedness in microbiome  
293 studies of large randomly mating populations, they should be used with caution in  
294 closely-related large families like this one.

295

## 296 **Limitations**

297 Because all individuals in our main cohort were members of the same extended  
298 Ashkenazi Jewish family, the genetic variation in our dataset is therefore much lower  
299 than between individuals from a wider population. It is conceivable that host genetics  
300 between more distantly-related individuals may play a significant role in affecting  
301 oral microbiome composition. Furthermore, our results only looked at overall genetic  
302 similarity, assessed using community comparison metrics based on taxa abundances.  
303 They therefore do not preclude the existence of fine-scale links between particular  
304 microbial taxa and individual genetic loci, particularly in immune-sensing genes such  
305 as those identified in the gut microbiome by Bonder et al. using a much larger cohort  
306 (30), although our study was not designed or powered to detect such associations.

307

308 Additionally, we lack detailed information on diet and lifestyle factors of individuals  
309 in this study. However, the shared cultural practices within this Ashkenazi Jewish  
310 family mean that it is not unreasonable to assume they share similar lifestyles and diet  
311 despite living in different locations around the world (25).

312

313 The apparent persistence of shared upbringing could be confounded by the fact that  
314 individuals may continue living near to the household where they grew up. If this  
315 were the case, then our observation could instead be due to the persistence of a shared  
316 environment beyond the household at a level intermediate between household and

317 city, rather than the persistence of a stable oral microbiome following environmental  
318 change. Finally, our samples represent only a single cross-sectional snapshot in time.  
319 More long-term longitudinal studies like the work of Stahringer et al. on twins (15)  
320 are necessary to investigate the persistence of the oral microbiome after its  
321 establishment early in life in a variety of relatedness settings.

322

### 323 **Conclusion**

324 In summary, our results incorporating a measure of genetic relatedness using SNPs  
325 demonstrate that the overall composition of the human oral microbiome in a large  
326 Ashkenazi Jewish family is largely influenced by shared environment rather than host  
327 genetics. An apparent significant effect of host genetics using pedigree-based  
328 estimates disappears when using genetic markers instead, which recommends caution  
329 in future microbiome research using pedigree relatedness as a proxy for host genetic  
330 similarity. Geographic structuring occurs to a greater extent at household level within  
331 cities than between cities on different continents. Living in the same household is  
332 associated with a more similar oral microbiome, and this effect persists after  
333 individuals have left the household. This is consistent with the long-term persistence  
334 of the oral microbiome composition established earlier in life due to shared  
335 upbringing.

## 336 **Materials and Methods**

337 **Ethics.** Ethical and research governance approval was provided by the National  
338 Research Ethics Service London Surrey Borders Committee and the UCL Research  
339 Ethics Committee. Written informed consent was provided by all participants.

340

341 **Cohort.** Our cohort contained data from 133 individuals within the same extended  
342 family (Family A) living in four disparate cities (I, II, III, IV) across three continents  
343 (see (22) for more information). We also had samples available from 18 individuals  
344 from a separate smaller family (Family B), and 27 unrelated Ashkenazi Jewish  
345 controls. All individuals studied were of genetically confirmed Ashkenazi Jewish  
346 ancestry (22, 25). When not directly available, shared household was inferred  
347 according to age; individuals within this community marry and subsequently leave the  
348 family home at a median age of 21 (95% CI: 19-26) (25). Therefore, we assumed that

349 individuals aged 18 or younger at the time of sampling were living with their parents  
350 and individuals aged 25 or older were not.

351

352 For analysis of the effects of household, we included only households with two or  
353 more individuals so as to remove the possibility that we were only measuring inter-  
354 individual differences, which can be large in the oral microbiome (17, 21). 26  
355 individuals were living with at least one other individual at the time of sampling in a  
356 total of nine households. An additional 35 individuals who had grown up in a shared  
357 household with at least one other individual in the cohort, but who were no longer  
358 living together were subsequently included in the analysis.

359

360 **Sampling.** Saliva samples were collected in sterile tubes containing saliva  
361 preservative buffer as per the method of Quinque et al. (31). For full protocol see the  
362 Supplementary Material. 500ml of saliva/preservative buffer were used with  
363 PurElute™ Bacterial Genomic Kit (Edge Biosystems, Gaithersburg, MD) for DNA  
364 extraction. After bacterial DNA extraction, three spikes were added to all samples in a  
365 final concentration of 4pg/ml, 0.4pg/ml and 0.08pg/ml, respectively.

366

367 **PCR amplification, purification and sequencing.** The Mastermix 16S Basic  
368 containing MolTaq 16S DNA polymerase (Molzylm GmbH & Co.KG, Bremen,  
369 Germany) was used to generate PCR amplicons. PCR amplicons were purified in two  
370 rounds using the Agencourt® AMPure® system (Beckman Coulter, Beverly,  
371 Massachusetts) in an automated liquid handler Hamilton StarLet (Hamilton Company,  
372 Boston, Massachusetts). DNA quantitation and quality control was performed using  
373 the Agilent 2100 Bioanalyzer system (Agilent Technologies, Inc., Santa Clara, CA).  
374 We used 785F and 1175R 16S rRNA primers (Supplementary Data Table 1) that  
375 amplified the V5-V7 region of the 16S rRNA gene on the Illumina MiSeq System  
376 (Illumina, San Diego, CA).

377

378 **Quality control.** To assess technical variation across runs, we spiked samples during  
379 library preparation with a fixed amount of synthetic DNA (see Supplementary  
380 Material). Three unique spike sequences (length 350) were designed which could be  
381 easily identifiable for quality control purposes. We found, as expected, that the  
382 number of spike sequences and the number of putative 16S sequences (length

383 between 350 and 380 bases) were negatively correlated with each other due to the  
384 limited total sequencing depth of the Illumina Miseq (Supplementary Figure 1). The  
385 variation in reads corresponding to this spike across samples was independent of run.  
386 We also resequenced a subset of samples without spikes to verify whether spikes  
387 affected our analyses and observed the same qualitative differences (Supplementary  
388 Figure 2), implying that the addition of spikes did not have a negative impact on  
389 downstream analysis. Paired-end reads were merged with fastq-mergepairs in  
390 VSEARCH v1.11.1 (32), discarding reads with an expected error >1. As the expected  
391 length of the V5-V7 region was 369 bases, we discarded sequences with <350 or  
392 >380 bases.

393

394 **Clustering and taxonomic classification.** Sequences were clustered with Minimum  
395 Entropy Decomposition (MED) (33). MED requires that the variation in read depth  
396 across samples does not differ by several orders of magnitude, so we discarded  
397 samples with fewer than 5,000 reads and subsampled to a maximum number of  
398 20,000 sequences, resulting in 6,353,210 sequences. We ran MED v2.1 with default  
399 parameters (see Supplementary Methods), identifying 271 phylotypes in the dataset  
400 (Supplementary Table 2). MED offers higher resolution compared to Operational  
401 Taxonomic Unit (OTU) picking methods, and has previously been shown to  
402 differentiate the composition of the oral microbiome of individuals over time even  
403 within the same genus (21). We verified that using MED phylotypes gave very similar  
404 compositional dissimilarities compared to using OTUs (Supplementary Figure 3) but  
405 allowed slightly increased statistical power in analysis of variance (see  
406 Supplementary Material), consistent with the literature (33). MED phylotypes had  
407 taxonomy assigned using RDP (34) against the Human Oral Microbiome Database  
408 (HOMD) (35). Comparison to Human Microbiome Project (HMP) oral samples also  
409 indicated that Ashkenazi Jewish individuals do not have a significantly different oral  
410 microbiome from other populations, with Ashkenazi Jewish saliva samples clustering  
411 with non-plaque samples from individuals in the HMP (Supplementary Figure 4).  
412 However, the use of different primers makes it difficult to reach a robust conclusion  
413 on this point.

414

415 **Inclusion of host genetics.** We investigated the effect of relatedness between  
416 individuals on oral microbiome composition using both genetic kinships (based on

417 SNPs) and pedigree kinships (based on the pedigree). We calculated pedigree  
418 kinships with kinship2 (36) and genetic kinships with LDAK v5.94 (37) using  
419 genome-wide SNP data from either the Illumina HumanCytoSNPv12 (Illumina, USA)  
420 or the Illumina HumanCoreExome-24, as described previously (22). These genetic  
421 kinships  $k_g$  are normalized to have a mean of zero, and correspond to genetic  
422 similarity between individuals.  $k_g$  correlates with the pedigree kinship  $k_p$  but there  
423 can be substantial spread around the expected values due to the random nature of  
424 genetic inheritance (Supplementary Figure 4a), making  $k_g$  a more accurate measure  
425 of true genetic similarity between individuals (23). We converted these kinships to  
426 dissimilarities and then Euclidean distances (Supplementary Information) which were  
427 used in a multidimensional scaling (MDS) ordination (Supplementary Figure 8).  
428 Following Blekhman et al. (12) we used MDS with five axes as covariates in a  
429 permutational analysis of variance of oral microbiome dissimilarities.

430

431 **Statistical analysis.** We calculated Bray-Curtis dissimilarities between samples based  
432 on relative abundances of phylotypes, excluding samples with fewer than 1000 reads.  
433 Variance explained in Bray-Curtis dissimilarities was calculated using the `adonis`  
434 function from the `vegan` v2.4.1 package in R, which performs a permutational  
435 analysis of variance of distance matrices (38). We used  $n=9999$  permutations, with  
436 permutations stratified by geographical sample location where appropriate.

437

#### 438 **Funding information**

439 The project was supported through the following charities and research  
440 councils: EFFORT (Eastman Foundation For Oral Research and Training), the  
441 Charles Wolfson Charitable Trust, and the Medical Research Council  
442 (MR/L000261/1). APL was supported by the Irwin Joffe Memorial Fellowship. LS  
443 was supported by the Engineering and Physical Sciences Research Council  
444 (EP/F500351/1). ALRR was supported by CAPES foundation, Ministry of Education  
445 of Brazil (0698130). The funders had no role in study design, data collection and  
446 interpretation, or the decision to submit the work for publication.

447

#### 448 **Acknowledgments**

449 The authors acknowledge all individuals who kindly participated in this study.

## 450 **References**

451

- 452 1. **Huttenhower C, Gevers D, Knight R.** 2012. Structure, function and diversity  
453 of the healthy human microbiome. *Nature* **486**:207–214.
- 454 2. **Wade WG.** 2013. The oral microbiome in health and disease. *Pharmacol Res*  
455 **69**:137–43.
- 456 3. **Yang F, Zeng X, Ning K, Liu K-L, Lo C-C, Wang W, Chen J, Wang D,**  
457 **Huang R, Chang X, Chain PS, Xie G, Ling J, Xu J.** 2012. Saliva  
458 microbiomes distinguish caries-active from healthy human populations. *ISME*  
459 *J* **6**:1–10.
- 460 4. **Teles R, Teles F, Frias-Lopez J, Paster B, Haffajee A.** 2013. Lessons learned  
461 and unlearned in periodontal microbiology. *Periodontol 2000* **62**:95–162.
- 462 5. **Ren W, Zhang Q, Liu X, Zheng S, Ma L, Chen F, Xu T, Xu B.** 2016.  
463 Supragingival Plaque Microbial Community Analysis of Children with  
464 Halitosis. *J Microbiol Biotechnol* **26**:2141–2147.
- 465 6. **Lucas López R, Grande Burgos MJ, Gálvez A, Pérez Pulido R.** 2017. The  
466 human gastrointestinal tract and oral microbiota in inflammatory bowel  
467 disease: a state of the science review. *APMIS* **125**:3–10.
- 468 7. **Eren AM, Maignien L, Sul WJ, Murphy LG, Grim SL, Morrison HG,**  
469 **Sogin ML.** 2013. Oligotyping: Differentiating between closely related  
470 microbial taxa using 16S rRNA gene data. *Methods Ecol Evol* **4**.
- 471 8. **Mark Welch JL, Rossetti BJ, Rieken CW, Dewhirst FE, Borisy GG.** 2016.  
472 Biogeography of a human oral microbiome at the micron scale. *Proc Natl Acad*  
473 *Sci* 201522149.
- 474 9. **Krishnan K, Chen T, Paster B.** 2016. A practical guide to the oral  
475 microbiome and its relation to health and disease. *Oral Dis*.
- 476 10. **Takeshita T, Kageyama S, Furuta M, Tsuboi H, Takeuchi K, Shibata Y,**  
477 **Shimazaki Y, Akifusa S, Ninomiya T, Kiyohara Y, Yamashita Y.** 2016.  
478 Bacterial diversity in saliva and oral health-related conditions: the Hisayama  
479 Study. *Sci Rep* **6**:22164.
- 480 11. **Belstrøm D, Holmstrup P, Bardow A, Kokaras A, Fiehn N-E, Paster BJ.**  
481 2016. Temporal Stability of the Salivary Microbiota in Oral Health. *PLoS One*  
482 **11**:e0147472.



- 483 12. **Blekhman R, Goodrich JK, Huang K, Sun Q, Bukowski R, Bell JT,**  
484 **Spector TD, Keinan A, Ley RE, Gevers D, Clark AG.** 2015. Host genetic  
485 variation impacts microbiome composition across human body sites. *Genome*  
486 *Biol* **16**:191.
- 487 13. **Turnbaugh PJ, Hamady M, Yatsunenko T, Cantarel BL, Duncan A, Ley**  
488 **RE, Sogin ML, Jones WJ, Roe BA, Affourtit JP, Egholm M, Henrissat B,**  
489 **Heath AC, Knight R, Gordon JI.** 2009. A core gut microbiome in obese and  
490 lean twins. *Nature* **457**:480–484.
- 491 14. **Yatsunenko T, Rey FE, Manary MJ, Trehan I, Dominguez-Bello MG,**  
492 **Contreras M, Magris M, Hidalgo G, Baldassano RN, Anokhin AP, Heath**  
493 **AC, Warner B, Reeder J, Kuczynski J, Caporaso JG, Lozupone CA,**  
494 **Lauber C, Clemente JC, Knights D, Knight R, Gordon JI.** 2012. Human  
495 gut microbiome viewed across age and geography. *Nature* **486**:222.
- 496 15. **Stahring SS, Clemente JC, Corley RP, Hewitt J, Knights D, Walters**  
497 **WA, Knight R, Krauter KS.** 2012. Nurture trumps nature in a longitudinal  
498 survey of salivary bacterial communities in twins from early adolescence to  
499 early adulthood. *Genome Res* **22**:2146–52.
- 500 16. **Zhernakova A, Kurilshikov A, Bonder MJ, Tigchelaar EF, Schirmer M,**  
501 **Vatanen T, Mujagic Z, Vila AV, Falony G, Vieira-Silva S, Wang J,**  
502 **Imhann F, Brandsma E, Jankipersadsing SA, Joossens M, Cenit MC,**  
503 **Deelen P, Swertz MA, Weersma RK, Feskens EJM, Netea MG, Gevers D,**  
504 **Jonkers D, Franke L, Aulchenko YS, Huttenhower C, Raes J, Hofker MH,**  
505 **Xavier RJ, Wijmenga C, Fu J.** 2016. Population-based metagenomics  
506 analysis reveals markers for gut microbiome composition and diversity.  
507 *Science* (80- ) **352**.
- 508 17. **Nasidze I, Li J, Quinque D, Tang K, Stoneking M.** 2009. Global diversity in  
509 the human salivary microbiome. *Genome Res* **19**:636–43.
- 510 18. **Song SJ, Lauber C, Costello EK, Lozupone CA, Humphrey G, Berg-Lyons**  
511 **D, Caporaso JG, Knights D, Clemente JC, Nakielny S, Gordon JI, Fierer**  
512 **N, Knight R.** 2013. Cohabiting family members share microbiota with one  
513 another and with their dogs. *Elife* **2**:e00458.
- 514 19. **Abeles SR, Jones MB, Santiago-Rodriguez TM, Ly M, Klitgord N,**  
515 **Yooseph S, Nelson KE, Pride DT.** 2016. Microbial diversity in individuals  
516 and their household contacts following typical antibiotic courses. *Microbiome*

- 517 4:39.
- 518 20. **Cephas KD, Kim J, Mathai RA, Barry KA, Dowd SE, Meline BS, Swanson**  
519 **KS.** 2011. Comparative Analysis of Salivary Bacterial Microbiome Diversity  
520 in Edentulous Infants and Their Mothers or Primary Care Givers Using  
521 Pyrosequencing. *PLoS One* **6**:e23503.
- 522 21. **Utter DR, Mark Welch JL, Borisy GG.** 2016. Individuality, Stability, and  
523 Variability of the Plaque Microbiome. *Front Microbiol* **7**:564.
- 524 22. **Levine AP, Pontikos N, Schiff ER, Jostins L, Speed D, Lovat LB, Barrett**  
525 **JC, Grasberger H, Plagnol V, Segal AW.** 2016. Genetic Complexity of  
526 Crohn's Disease in 2 Large Ashkenazi Jewish Families. *Gastroenterology*.
- 527 23. **Speed D, Balding DJ.** 2014. Relatedness in the post-genomic era: is it still  
528 useful? *Nat Rev Genet* **16**:33–44.
- 529 24. **Dewhirst FE, Chen T, Izard J, Paster BJ, Tanner ACR, Yu W-H,**  
530 **Lakshmanan A, Wade WG.** 2010. The human oral microbiome. *J Bacteriol*  
531 **192**:5002–17.
- 532 25. **Levine A.** 2015. The genetics of inflammatory bowel disease in extended  
533 multiplex Ashkenazi Jewish kindreds. Dr thesis, UCL (University Coll  
534 London) .
- 535 26. **David LA, Materna AC, Friedman J, Campos-Baptista MI, Blackburn**  
536 **MC, Perrotta A, Erdman SE, Alm EJ.** 2014. Host lifestyle affects human  
537 microbiota on daily timescales. *Genome Biol* **15**:R89.
- 538 27. **Nunes T, Fiorino G, Danese S, Sans M.** 2011. Familial aggregation in  
539 inflammatory bowel disease: Is it genes or environment? *World J Gastroenterol*  
540 **17**:2715.
- 541 28. **Zaura E, Brandt BW, Teixeira de Mattos MJ, Buijs MJ, Caspers MPM,**  
542 **Rashid M-U, Weintraub A, Nord CE, Savell A, Hu Y, Coates AR, Hubank**  
543 **M, Spratt DA, Wilson M, Keijser BJJ, Crielaard W.** 2015. Same Exposure  
544 but Two Radically Different Responses to Antibiotics: Resilience of the  
545 Salivary Microbiome versus Long-Term Microbial Shifts in Feces. *MBio*  
546 **6**:e01693-15.
- 547 29. **Marsh PD, Head DA, Devine DA.** 2015. Dental plaque as a biofilm and a  
548 microbial community – implications for treatment. *J Oral Biosci*.
- 549 30. **Bonder MJ, Kurilshikov A, Tigchelaar EF, Mujagic Z, Imhann F, Vila**  
550 **AV, Deelen P, Vatanen T, Schirmer M, Smeekens SP, Zhernakova D V,**

- 551 **Jankipersadsing SA, Jaeger M, Oosting M, Cenit MC, Masclee AAM,**  
552 **Swertz MA, Li Y, Kumar V, Joosten L, Harmsen H, Weersma RK, Franke**  
553 **L, Hofker MH, Xavier RJ, Jonkers D, Netea MG, Wijmenga C, Fu J,**  
554 **Zhernakova A.** 2016. The effect of host genetics on the gut microbiome. *Nat*  
555 *Genet* **48**:1407–1412.
- 556 31. **Quinque D, Kittler R, Kayser M, Stoneking M, Nasidze I.** 2006. Evaluation  
557 of saliva as a source of human DNA for population and association studies.  
558 *Anal Biochem* **353**:272–277.
- 559 32. **Rognes T, Flouri T, Nichols B, Quince C, Mahé F.** 2016. VSEARCH: a  
560 versatile open source tool for metagenomics. *PeerJ* **4**:e2584.
- 561 33. **Eren AM, Morrison HG, Lescault PJ, Reveillaud J, Vineis JH, Sogin ML.**  
562 2014. Minimum entropy decomposition: Unsupervised oligotyping for  
563 sensitive partitioning of high-throughput marker gene sequences. *ISME J*  
564 **9**:968–979.
- 565 34. **Wang Q, Garrity GM, Tiedje JM, Cole JR.** 2007. Naive Bayesian classifier  
566 for rapid assignment of rRNA sequences into the new bacterial taxonomy.  
567 *Appl Environ Microbiol* **73**:5261–7.
- 568 35. **Chen T, Yu W-H, Izard J, Baranova O V, Lakshmanan A, Dewhirst FE.**  
569 2010. The Human Oral Microbiome Database: a web accessible resource for  
570 investigating oral microbe taxonomic and genomic information. *Database*  
571 (Oxford) **2010**:baq013.
- 572 36. **Sinnwell JP, Therneau TM, Schaid DJ.** 2014. The kinship2 R package for  
573 pedigree data. *Hum Hered* **78**:91–3.
- 574 37. **Speed D, Hemani G, Johnson MR, Balding DJ.** 2012. Improved heritability  
575 estimation from genome-wide SNPs. *Am J Hum Genet* **91**:1011–21.
- 576 38. **Oksanen J.** 2016. *vegan*: Community Ecology Package.  
577

## 578 **Figure legends**

579 **Figure 1. This cohort contains a representative sample of variation in oral**  
580 **microbiome composition. (a)** Relative abundance of the six bacterial phyla found in  
581 saliva samples from Family A, sorted by decreasing *Firmicutes* content. Color scheme  
582 adapted from Stahringer et al. (15). Taxonomy was assigned to 271 MED phylotypes  
583 using RDP based on the HOMD database. **(b)** Non-metric multidimensional scaling  
584 based on Bray-Curtis distances between samples shows high overlap between Family  
585 A (black circles), Family B (red triangles), and unrelated Ashkenazi Jewish controls  
586 (blue diamonds).

587

588 **Figure 2. Oral microbiome composition is associated with household.** Oral  
589 microbiome samples cluster by household (colours), shown by (a) a non-metric  
590 multidimensional scaling based on Bray-Curtis distances between samples from  
591 individuals in a particular subfamily ( $n=44$ ) within Family A. This figure includes  
592 individuals who are currently living together (filled circles), those who had moved out  
593 of their childhood home (empty circles), and those for whom data was missing (faint  
594 circles). This clustering could be due to shared environment or also due to shared  
595 genetics, as is obvious from (b) the pedigree.

596

597 **Figure 3. Household-level variation within a genus, shown here with the relative**  
598 **abundance of phylotypes within *Leptotrichia*.** The relative abundance of phylotypes  
599 within seven pairs of spouses shows clear associations with household. These patterns  
600 are to some extent recapitulated in their children. Looking at children still living at  
601 home, MED phylotype X2772 is not observed in any individual from household A2.4,  
602 but is found in both spouses and two children living in household A1.7. Red dots  
603 indicate children aged 10 or under at time of sampling, who appear more similar to  
604 each other than other pairs of children. For variation within the top twelve most  
605 abundant genera between spouses, see Supplementary Figure 9.

| <b>(a) 26<br/>individuals</b> | City only |       | Household only |       | City and household* |       |
|-------------------------------|-----------|-------|----------------|-------|---------------------|-------|
|                               | $R^2$     | $p$   | $R^2$          | $p$   | $R^2$               | $p$   |
| Sequencing plate              | 0.048     | 0.190 | 0.048          | 0.075 | 0.048               | 0.458 |
| Gender                        | 0.032     | 0.724 | 0.032          | 0.4   | 0.032               | 0.467 |
| Age                           | 0.069     | 0.017 | 0.069          | 0.004 | 0.069               | 0.013 |
| MDS1                          | 0.031     | 0.757 | 0.031          | 0.537 | 0.031               | 0.727 |
| MDS2                          | 0.050     | 0.142 | 0.050          | 0.052 | 0.050               | 0.099 |
| MDS3                          | 0.030     | 0.807 | 0.030          | 0.585 | 0.030               | 0.862 |
| MDS4                          | 0.049     | 0.162 | 0.049          | 0.054 | 0.049               | 0.097 |
| MDS5                          | 0.029     | 0.824 | 0.029          | 0.614 | 0.029               | 0.791 |
| City                          | 0.080     | 0.400 | -              | -     | 0.080               | 0.178 |
| Household                     | -         | -     | 0.300          | 0.001 | 0.220               | 0.001 |
| Residuals                     | 0.582     | -     | 0.362          | -     | 0.362               | -     |
| Total                         | 1.000     | -     | 1.000          | -     | 1.000               | -     |
| <b>(b) 61<br/>individuals</b> | City only |       | Household only |       | City and household* |       |
|                               | $R^2$     | $p$   | $R^2$          | $p$   | $R^2$               | $p$   |
| Sequencing plate              | 0.029     | 0.018 | 0.029          | 0.012 | 0.029               | 0.013 |
| Gender                        | 0.018     | 0.258 | 0.018          | 0.219 | 0.018               | 0.257 |
| Age                           | 0.038     | 0.002 | 0.038          | 0.001 | 0.038               | 0.002 |
| MDS1                          | 0.014     | 0.668 | 0.014          | 0.607 | 0.014               | 0.740 |
| MDS2                          | 0.017     | 0.362 | 0.017          | 0.305 | 0.017               | 0.440 |
| MDS3                          | 0.020     | 0.173 | 0.020          | 0.141 | 0.020               | 0.263 |
| MDS4                          | 0.020     | 0.150 | 0.020          | 0.118 | 0.020               | 0.147 |
| MDS5                          | 0.012     | 0.783 | 0.012          | 0.744 | 0.012               | 0.943 |
| City                          | 0.056     | 0.149 | -              | -     | 0.056               | 0.934 |
| Household                     | -         | -     | 0.239          | 0.021 | 0.183               | 0.044 |
| Residuals                     | 0.777     | -     | 0.594          | -     | 0.594               | -     |
| Total                         | 1.000     | -     | 1.000          | -     | 1.000               | -     |

606 **Table 1.** Permutational analysis of variance (adonis) results based on (a) 26 co-  
607 habiting individuals who lived in the same household as at least one other individual  
608 and (b) 61 individuals who had at least co-habited at some point. \*Permutations  
609 stratified by city in this analysis.

|                    | Pedigree (kinship2) |        | Genome-wide SNPs (LDAK) |        |
|--------------------|---------------------|--------|-------------------------|--------|
|                    | $R^2$               | $p$    | $R^2$                   | $p$    |
| Sequencing plate   | 0.028               | <0.001 | 0.028                   | <0.001 |
| Gender             | 0.011               | 0.094  | 0.011                   | 0.096  |
| Age                | 0.023               | <0.001 | 0.023                   | <0.001 |
| MDS1               | 0.010               | 0.174  | 0.011                   | 0.119  |
| MDS2               | 0.007               | 0.706  | 0.010                   | 0.231  |
| MDS3               | 0.012               | 0.063  | 0.011                   | 0.131  |
| MDS4               | 0.016               | 0.009  | 0.011                   | 0.111  |
| MDS5               | 0.009               | 0.325  | 0.007                   | 0.617  |
| Parental household | 0.215               | <0.001 | 0.217                   | <0.001 |
| Residuals          | 0.670               | -      | 0.671                   | -      |
| Total              | 1                   | -      | 1                       | -      |

610 **Table 2.** Comparison of pedigree-based and genome-wide measures of kinship to take  
611 host genetics into account in a permutational analysis of variance (adonis) on oral  
612 microbiome dissimilarities of  $n=111$  individuals. Using pedigree information to  
613 produce kinship results in a significant association with human genetics via the fourth  
614 MDS axis, which is not present using kinships calculated with LDAK based on  
615 genome-wide SNPs.

(a)

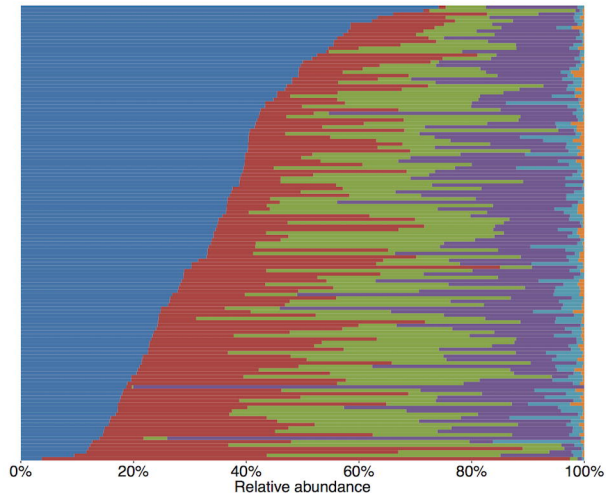

(b)

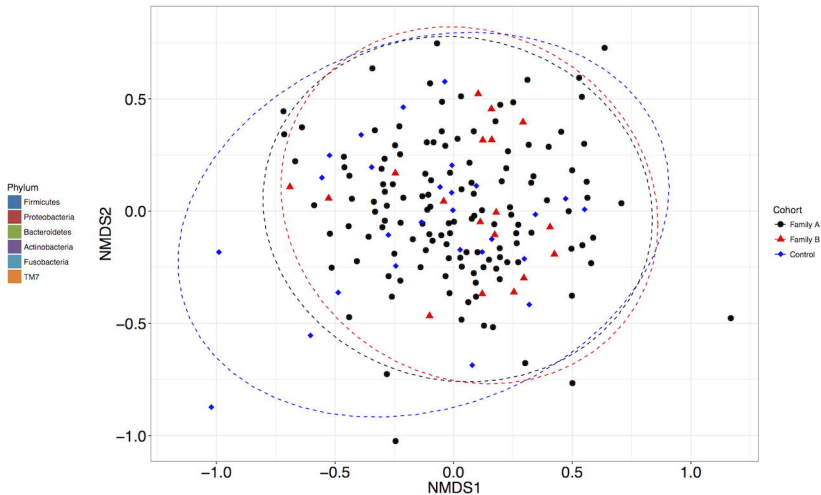

**Figure 1. This cohort contains a representative sample of variation in oral microbiome composition. (a)** Relative abundance of the six bacterial phyla found in saliva samples from Family A, sorted by decreasing *Firmicutes* content. Color scheme adapted from Stahringer et al. (15). Taxonomy was assigned to 271 MED phylotypes using RDP based on the HOMD database. **(b)** Non-metric multidimensional scaling based on Bray-Curtis distances between samples shows high overlap between Family A (black circles), Family B (red triangles), and unrelated Ashkenazi Jewish controls (blue diamonds).

(a) NMDS of oral microbiome samples

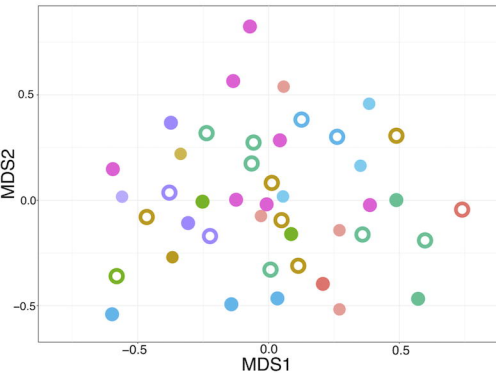

(b) Pedigree

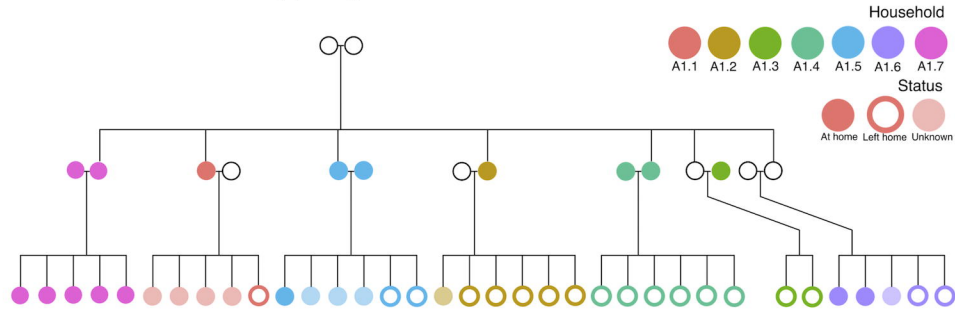

**Figure 2. Oral microbiome composition is associated with household.** Oral microbiome samples cluster by household (colours), shown by (a) a non-metric multidimensional scaling based on Bray-Curtis distances between samples from individuals in a particular subfamily ( $n=44$ ) within Family A. This figure includes individuals who are currently living together (filled circles), those who had moved out of their childhood home (empty circles), and those for whom data was missing (faint circles). This clustering could be due to shared environment or also due to shared genetics, as is obvious from (b) the pedigree.



# Spouses

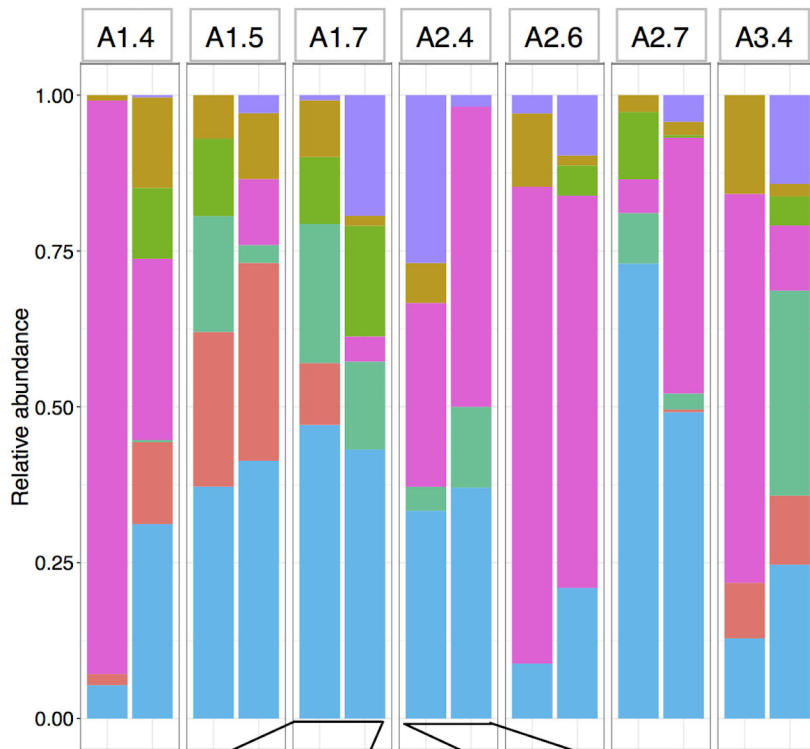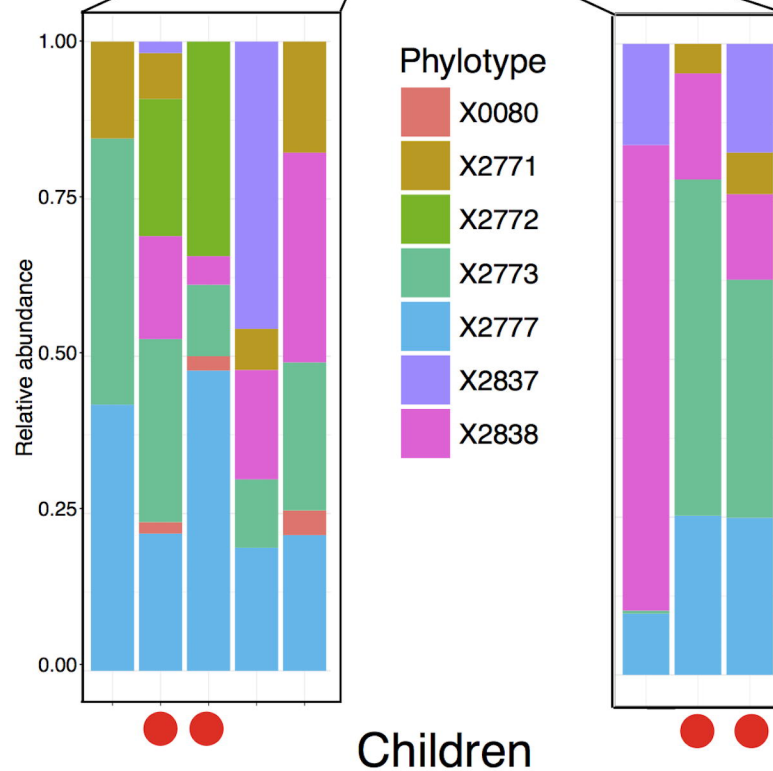

**Figure 3. Household-level variation within a genus, shown here with the relative abundance of phylotypes within *Leptotrichia*.** The relative abundance of phylotypes within seven pairs of spouses shows clear associations with household. These patterns are to some extent recapitulated in their children. Looking at children still living at home, MED phylotype X2772 is not observed in any individual from household A2.4, but is found in both spouses and two children living in household A1.7. Red dots indicate children aged 10 or under at time of sampling, who appear more similar to each other than other pairs of children. For variation in other genera between spouses, see Supplementary Figure 9.
